# Supplementary material for: Citrus limonoids and curcumin additively inhibit human colon cancer cells
Source: Royal Society of Chemistry journal article supplement (doi:10.1039/c3fo30325j), 2013-01-01
Supplement: c3fo30325j.pdf [file c3fo30325j.pdf]

## Supporting information

Title: Citrus limonoids and curcumin additively inhibit human colon cancer cells

Authors: K. N.C. Murthy, G. K Jayaprakasha and B. S Patil

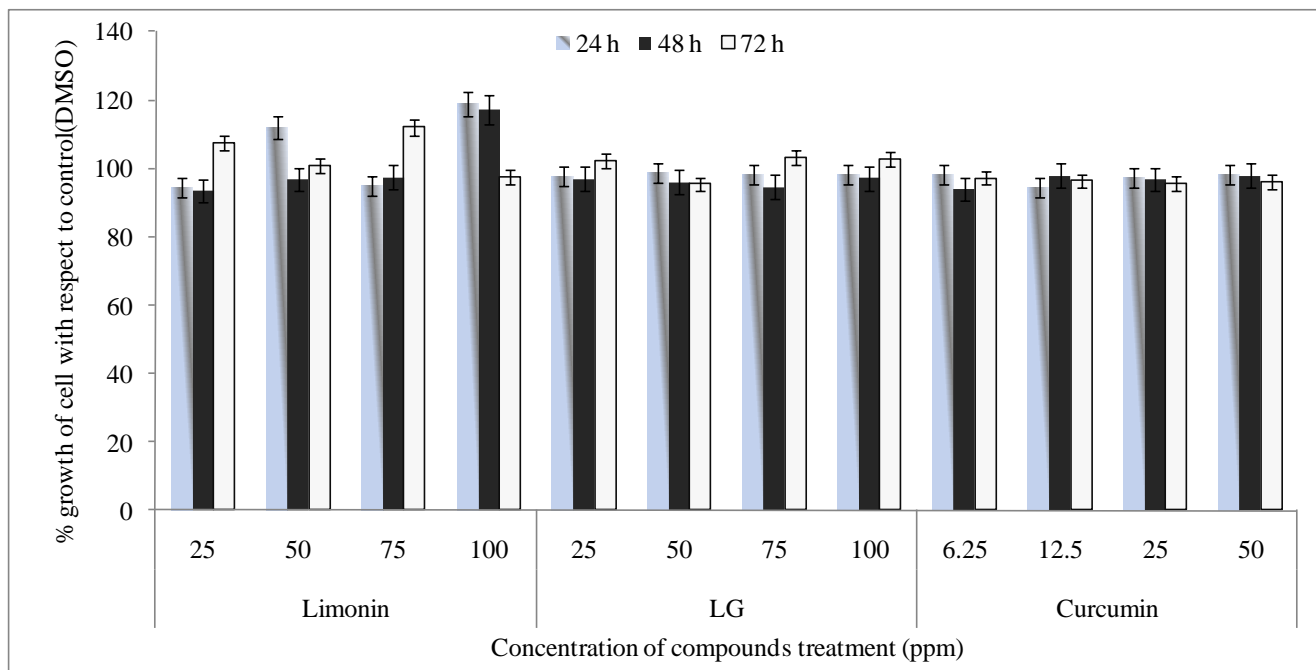

**Fig. S1-** Effect of limonin, LG and curcumin on proliferation of 112CoN cells measured by MTT assay. Cells were treated with the specified concentrations of compounds for 24, 48 and 72 h and amount of viable cells were spectrophotometrically estimated using MTT reagent. Results were expressed in % growth of cells compared to vehicle (DMSO) treated cells. There was no significance in differences in the % cell growth with samples treated compared to control (DMSO treated)
